# Supplementary material for: Salazinic acid attenuates male sexual dysfunction and testicular oxidative damage in streptozotocin-induced diabetic albino rats
Source: Royal Society of Chemistry journal article supplement (doi:10.1039/d3ra01542d), 2023-01-01
Supplement: d3ra01542d1.pdf [file d3ra01542d1.pdf]

### Supplementary data to

#### Salazinic acid attenuates male sexual dysfunction and testicular oxidative damage in streptozotocin-induced diabetic albino rats

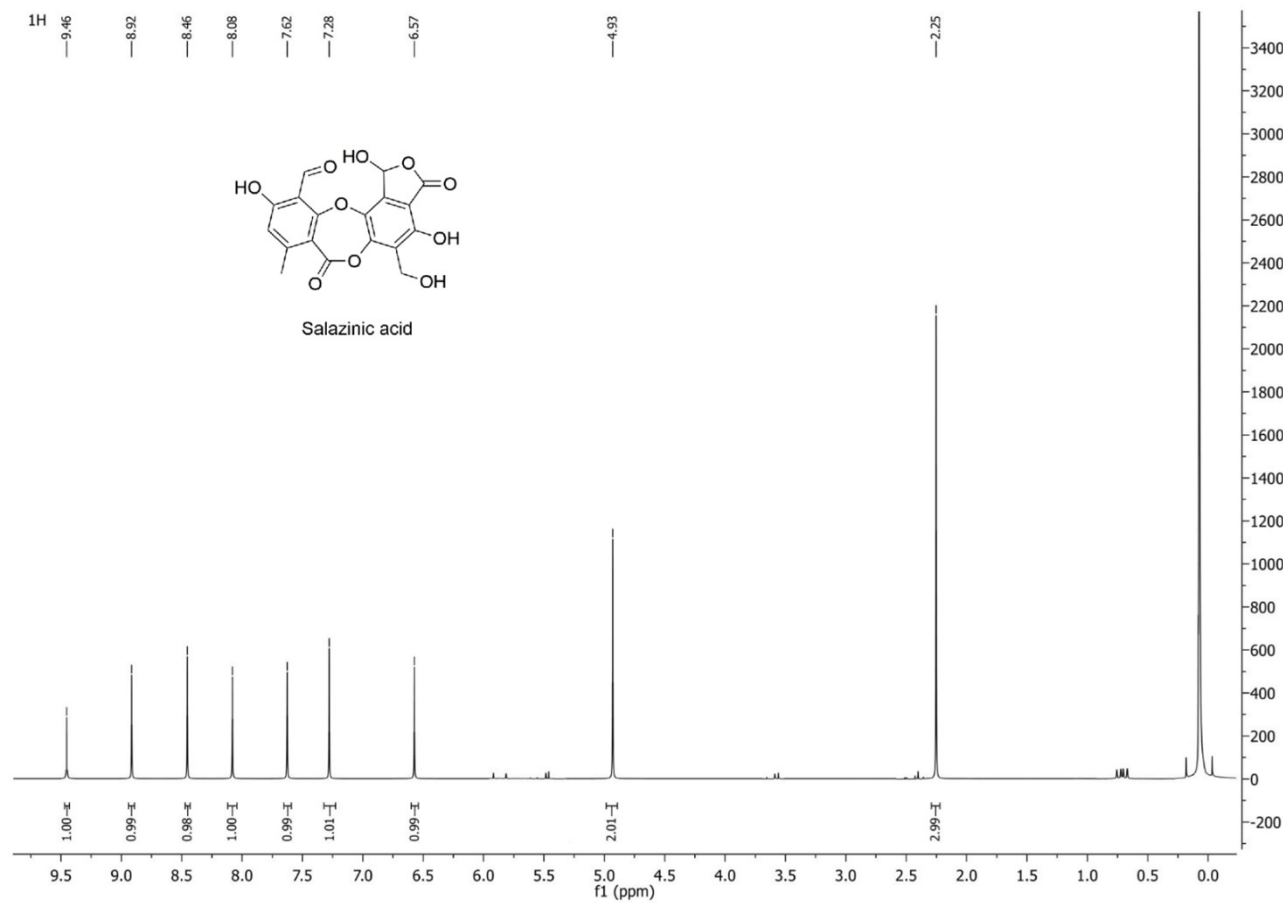

**Fig. S1** Proton NMR of Sa (DMSO-*d*<sub>6</sub>, 400 MHz).



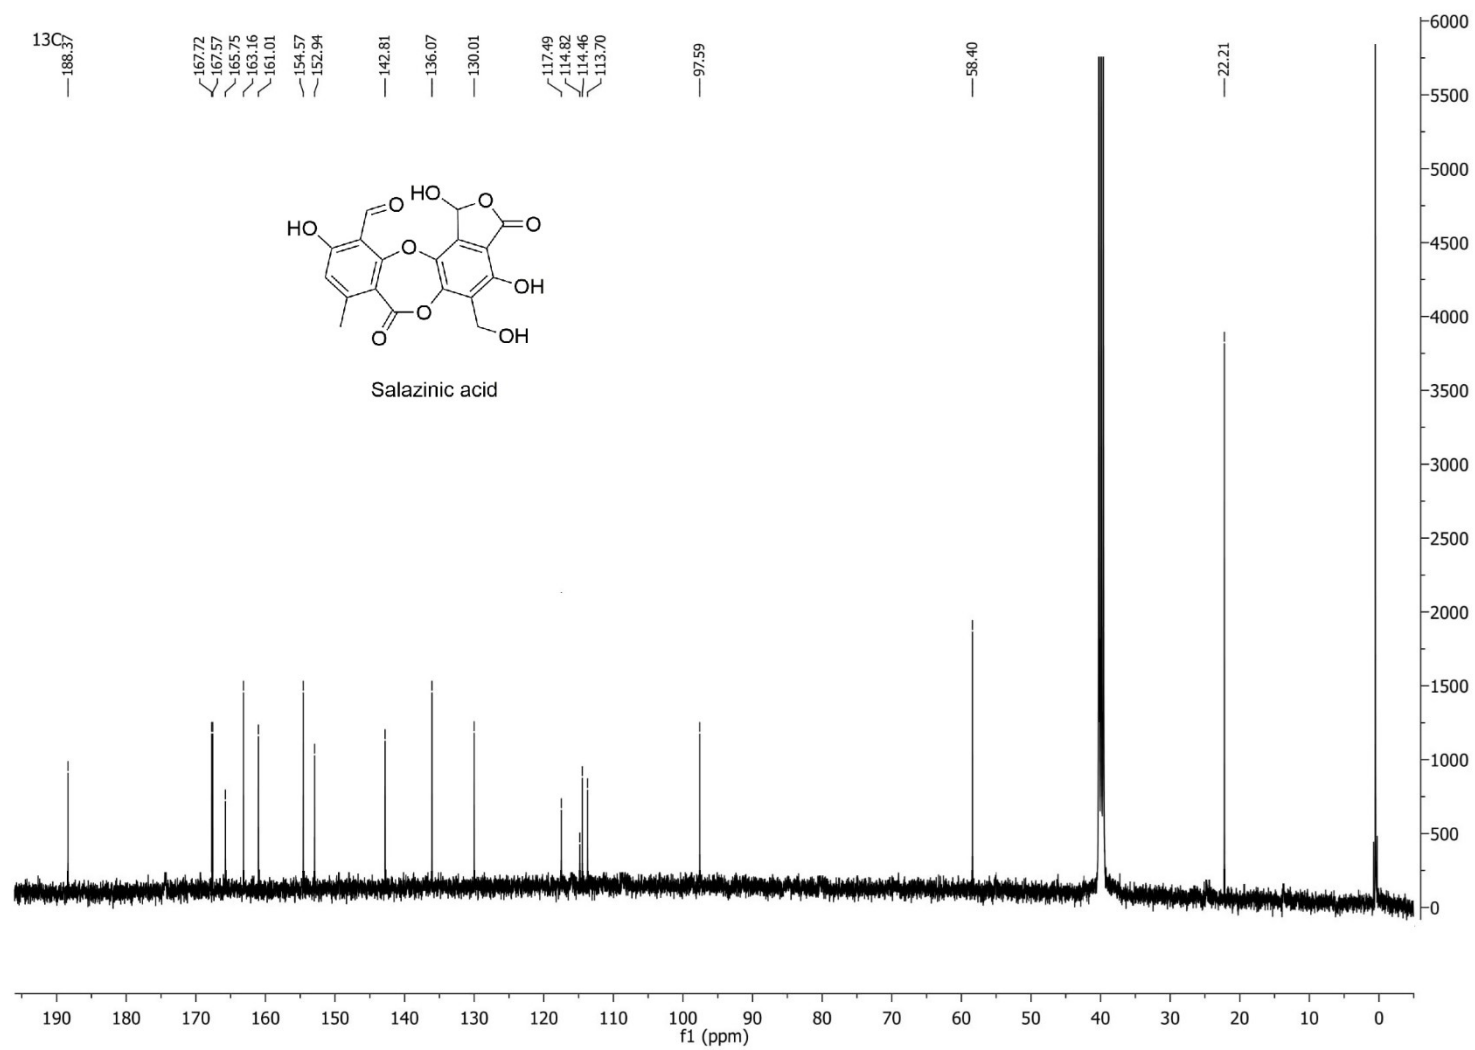

**Fig. S2** <sup>13</sup>C NMR of Sa (DMSO-*d*<sub>6</sub>, 400 MHz).



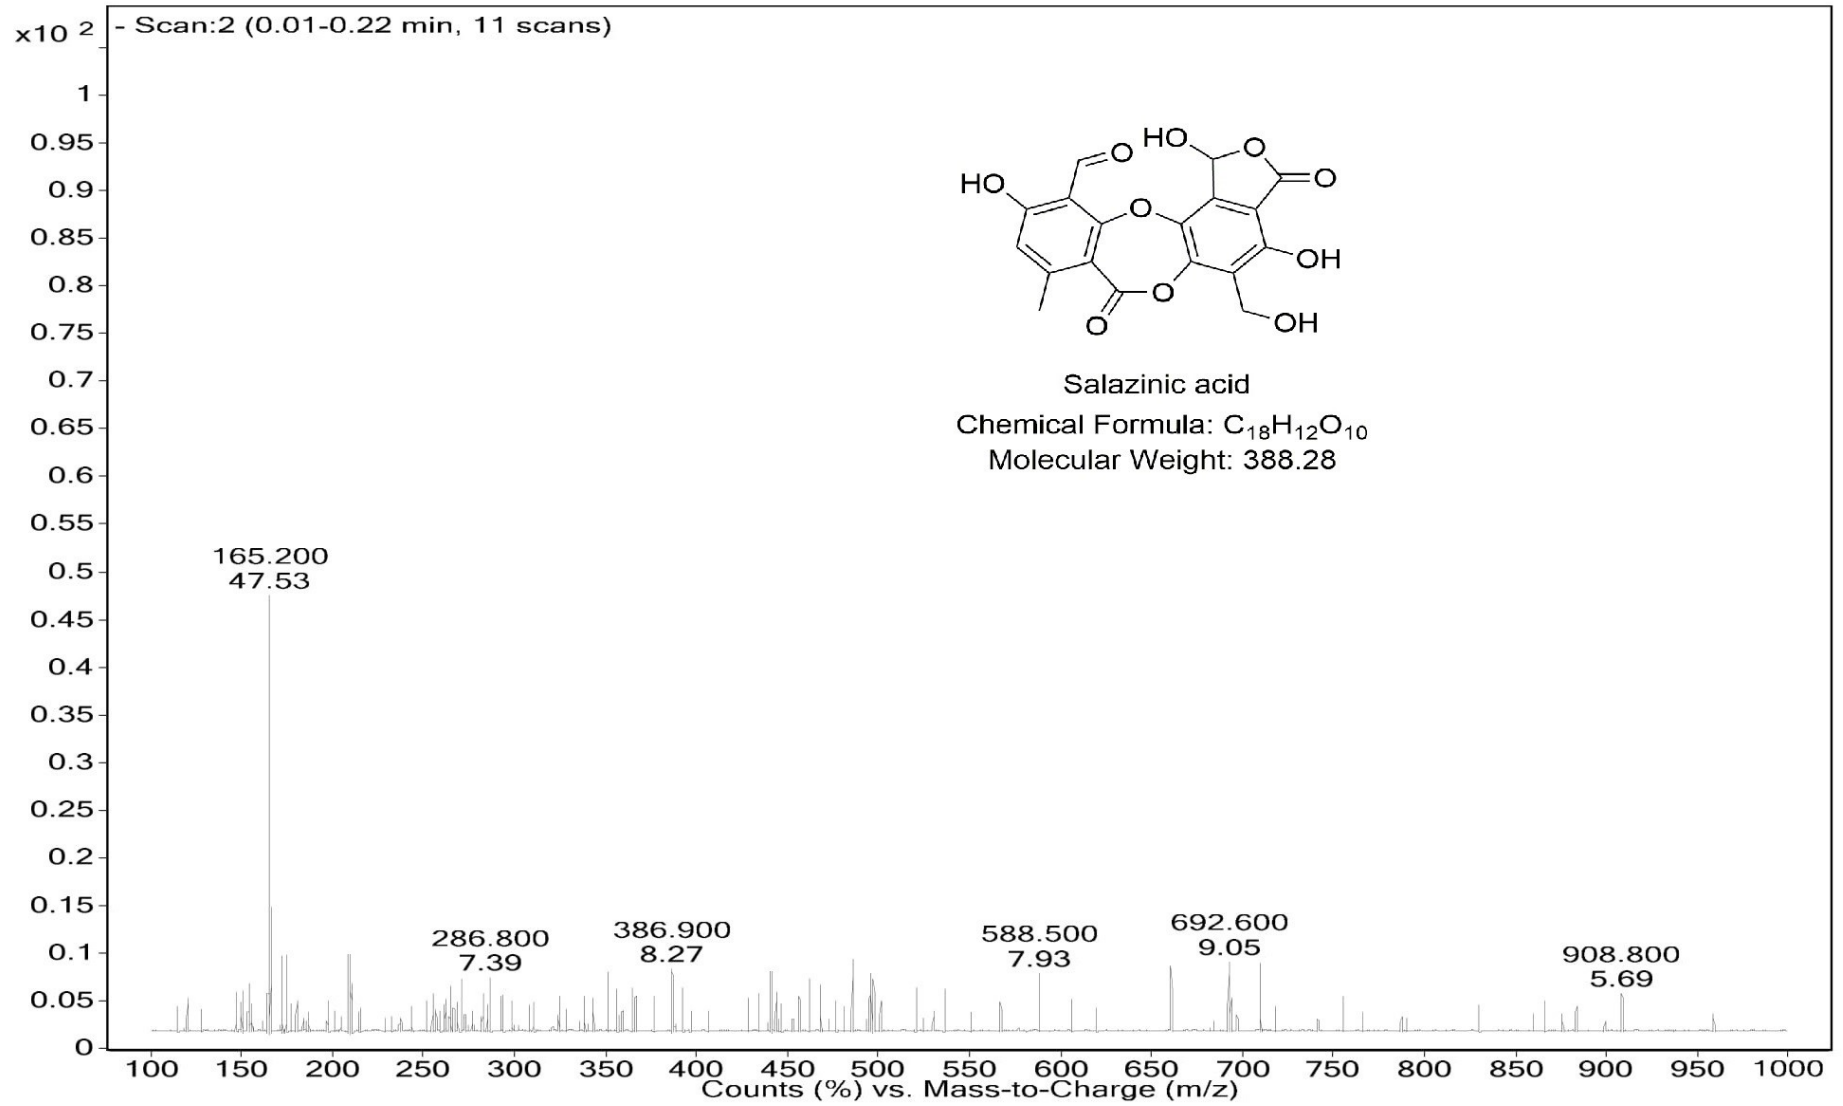

Fig. S3 ESI- MS of Sa.



## **Video Legends**

**Video S1.** Visualization of sperm morphology of diabetic control rats.

**Video S2.** Visualization of sperm morphology of Sa-treated (high dose) group.

**Video S3.** Visualization of sperm morphology of sildenafil citrate-treated group.
